# Supplementary material for: An opportunistic evaluation of a routine service improvement project to reduce falls in hospital
Source: PubMed Central journal article supplement (PMC7821491; doi:10.1186/s12913-021-06073-4), 2021-01-22
Supplement: 12913_2021_6073_MOESM2_ESM.pdf [file 12913_2021_6073_MOESM2_ESM.pdf]

## Appendix B. Supplementary tables and figures

**Appendix B, Table S1:** Evaluation of intervention using cubic splines for pre- and post-intervention time.

| Number of falls per 1000 bed days |              | Intervention         |         |
|-----------------------------------|--------------|----------------------|---------|
| Control                           | Intervention | IRR (95% CI)         | p-value |
| 6.62                              | 5.89         | 4.34 (0.61 to 31.10) | 0.144   |

IRR: Incidence rate ratio. CI: Confidence interval

**Appendix B, Table S2: Model parameters for cubic spline model**

| Parameter                               | IRR  | 95% CI        | p-value |
|-----------------------------------------|------|---------------|---------|
| <b>Intervention exposure</b>            | 4.34 | 0.61 to 31.10 | 0.144   |
| <b>Pre intervention spline point 1</b>  | 1.06 | 1.03 to 1.09  | 0.000   |
| <b>Pre intervention spline point 2</b>  | 0.74 | 0.62 to 0.88  | 0.001   |
| <b>Pre intervention spline point 3</b>  | 1.89 | 1.19 to 3.02  | 0.007   |
| <b>Pre intervention spline point 4</b>  | 0.67 | 0.36 to 1.25  | 0.204   |
| <b>Post intervention spline point 1</b> | 0.95 | 0.87 to 1.02  | 0.165   |
| <b>Post intervention spline point 2</b> | 0.97 | 0.66 to 1.44  | 0.892   |
| <b>Post intervention spline point 3</b> | 1.46 | 0.27 to 7.96  | 0.663   |
| <b>Post intervention spline point 4</b> | 0.51 | 0.05 to 5.10  | 0.566   |
| <b>Initial rate of falls</b>            | 5.42 | 4.66 to 6.30  |         |

IRR: Incidence rate ratio. CI: Confidence interval. Model was fitted with a fixed effect for intervention, a cubic spline for time pre-intervention, and a cubic spline for time post-intervention.

Appendix B, Figure S1: Partial autocorrelation plots for individual wards

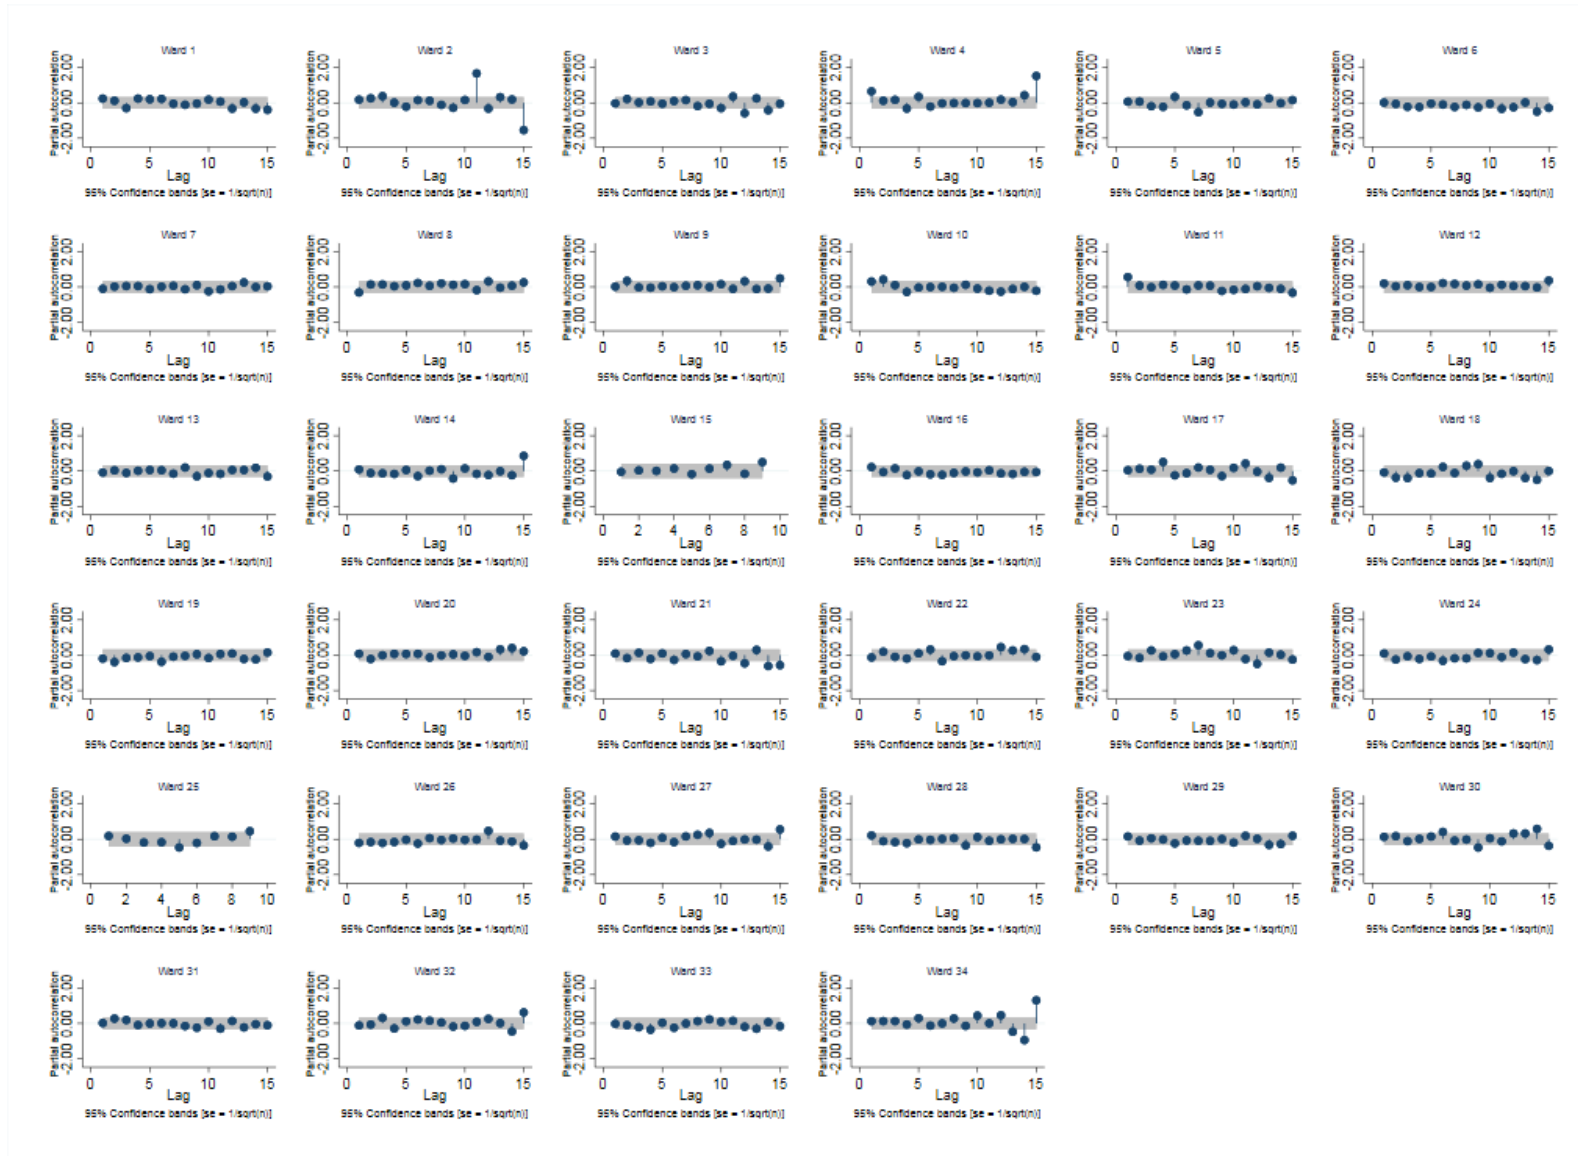

Appendix B, Figure S2: Observed vs predicted falls per 1000 bed days

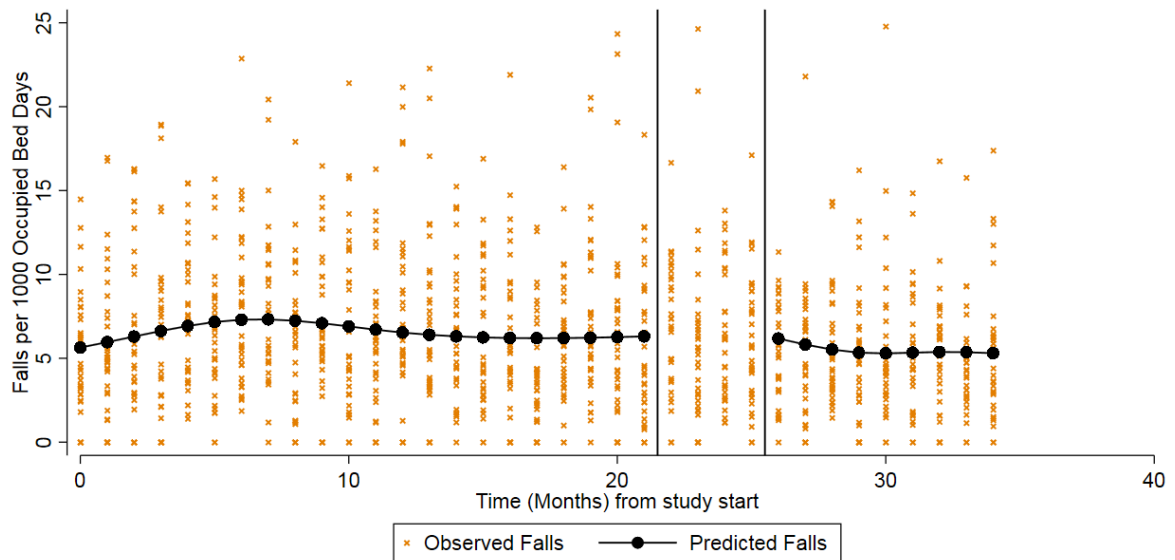

The black vertical lines indicate the beginning and end of the intervention implementation. A mixed effect Poisson model was used to estimate the predicted falls, with a random effect for ward and a cubic spline for pre- and post-intervention time trend.
